# Supplementary material for: Increased matrix stiffness promotes fibrogenesis of hepatic stellate cells through AP-1-induced chromatin priming
Source: Springer Nature journal article supplement (doi:10.1038/s42003-025-08160-2), 2025-06-12

## **Supplemental information**

### **Increased matrix stiffness promotes fibrogenesis of hepatic stellate cells through AP-1-induced chromatin priming**

**Wenxue Zhao, Weihong Yuan, Tian Dong, Wei Qi, Zhijie Feng, Cheng Li, Yujie Sun**

## Supplementary Figure 1

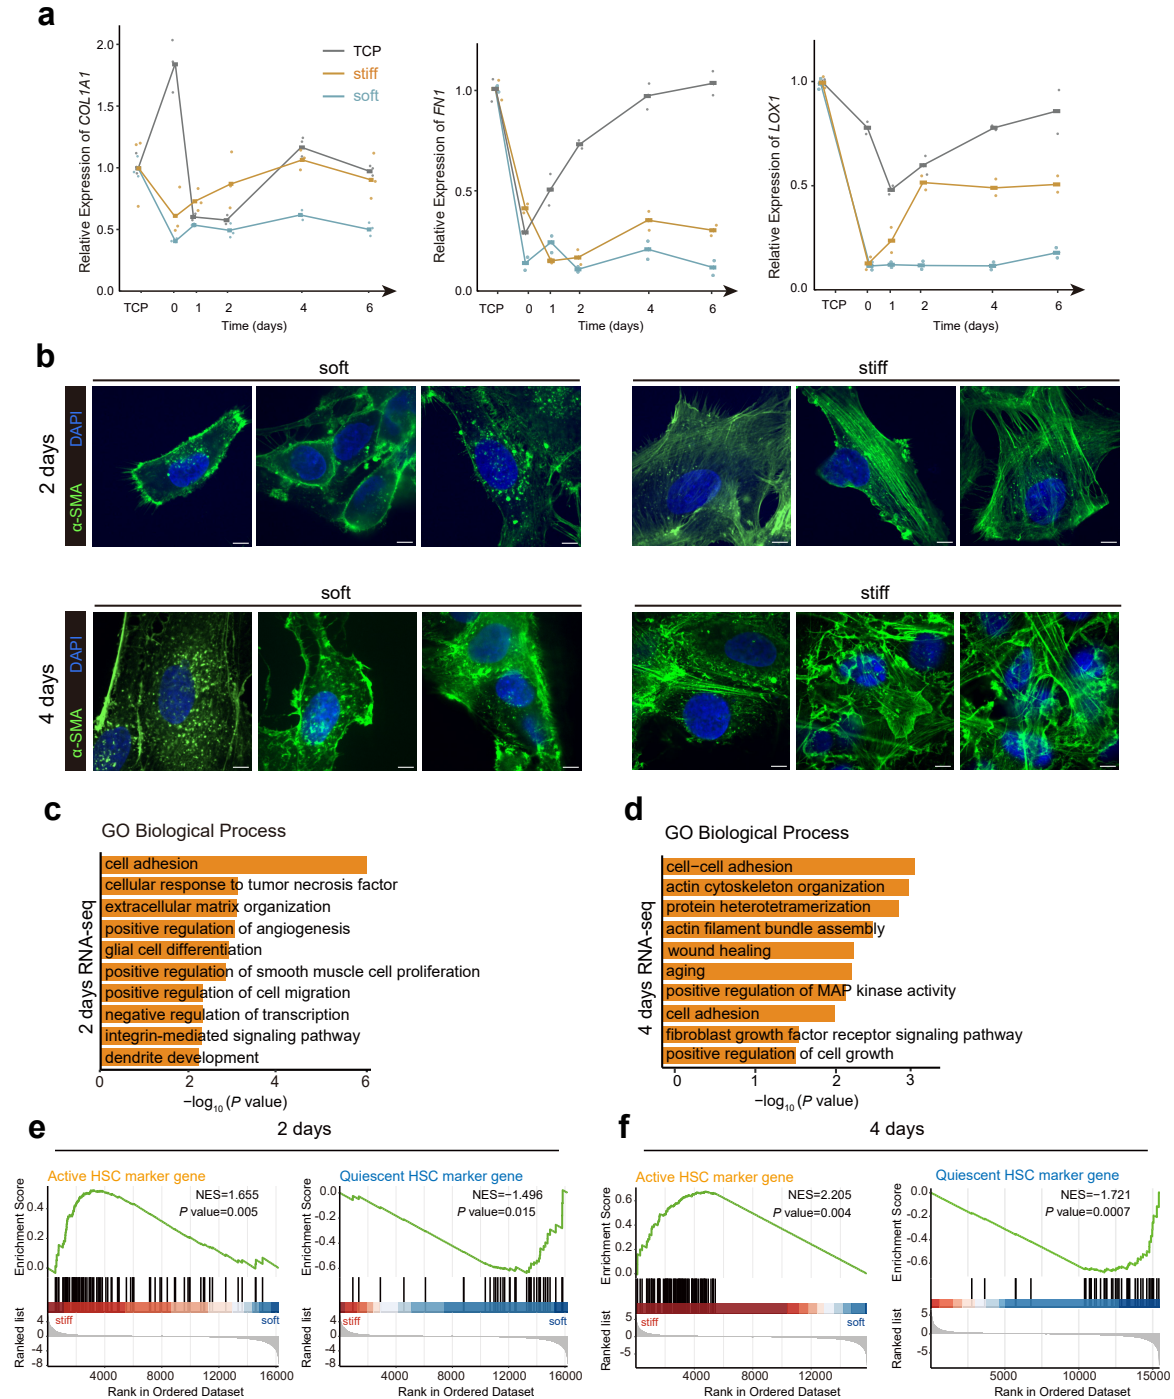

**Fig S1. Different matrix stiffness facilitates HSC fibrogenesis as revealed by transcriptome profiling.**

**a.** The relative expression levels of fibrotic genes in LX-2 cell lines over a period of days. The cells were initially plated on TCP and then isolated and reseeded onto soft and stiff matrices and TCP (used as a control). Each set of data contains at least two independent replicates. The bolded horizontal lines in each condition indicated the mean values.

- b.** Representative immunofluorescence images of LX-2 cells cultured on different matrices for two (up panel) or four days (bottom panel). scale bar, 10  $\mu$ m.
- c.** GO enrichment analysis of up-regulated genes in cells cultured in the stiff matrix for two days (adjusted p value < 0.05).
- d.** GO enrichment analysis of up-regulated genes in cells cultured in the stiff matrix for four days (adjusted p value < 0.05).
- e–f.** The GSEA results show that cells cultured on soft and stiff matrices for 2 days (**e**) and 4 days (**f**) were enriched with marker genes of quiescent and active HSCs respectively.

## Supplementary Figure 2

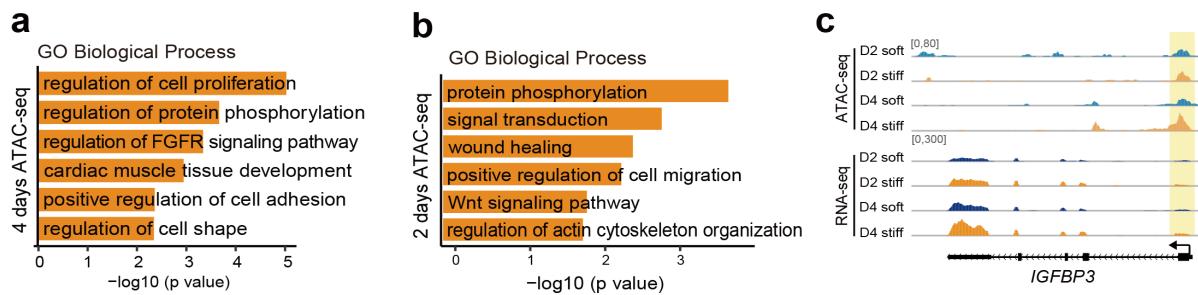

**Fig S2. ATAC-seq analysis of specific chromatin accessibility clusters and adjacent gene function annotation.**

- Top enriched GO (Gene Ontology) terms for peaks (adjusted p value < 0.05) in increased accessible chromatin regions in cells cultured in the stiff matrix for four days.
- Top enriched GO (Gene Ontology) terms for peaks (adjusted p value < 0.05) in increased accessible chromatin regions in cells cultured in stiff matrix for two days.
- Normalized ATAC-seq signal profiles at a locus in *IGFBP3* (“D4 stiff” cluster) in cells cultured in the soft or stiff matrix, shown together with a normalized RNA-seq profile.



### Supplementary Figure 3

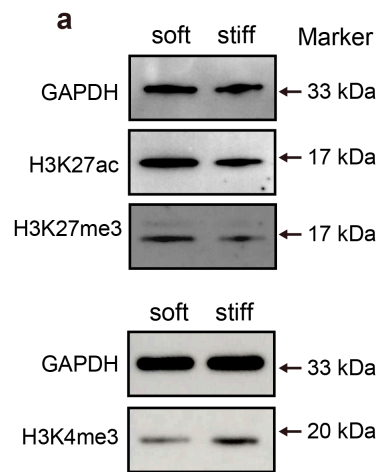

**Fig. S3 Characteristics of histone modification levels in the whole genome-wide (defined in Figure 2).**

**a.** Western blots showing the relative change of histone modification. GAPDH served as the loading control.

## Supplementary Figure 4

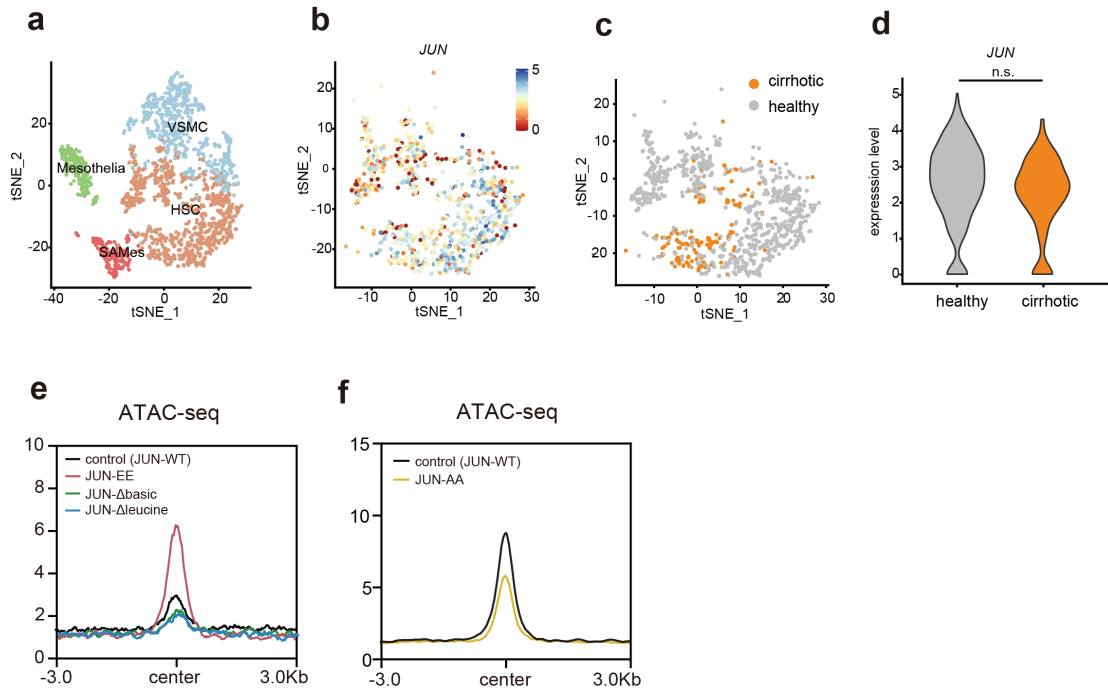

**Fig. S4 p-JUN contributes to the maintenance of primed chromatin accessibility related to fibrosis.**

- Clustering of 2,031 mesenchymal cells from healthy ( $n = 4$ ) and cirrhotic ( $n = 3$ ) human livers identified the HSC cluster.
- Expression of *JUN* across 946 HSCs from healthy ( $n = 4$ ) and cirrhotic ( $n = 3$ ) human livers (red, high; blue, low).
- Annotation of HSC injury condition (healthy or cirrhotic).
- Violin plot showing the expression of c-jun across HSCs from healthy ( $n = 4$ ) and cirrhotic ( $n = 3$ ) human livers. n.s., not significant (two-tailed wilcoxon test).
- Normalized ATAC-seq signal profiles in the chromatin regions excluding primed chromatin following the expression of JUN-EE, JUN-EE- $\Delta$ basic and JUN-EE- $\Delta$ leucine shown in Fig. 5a.
- Normalized ATAC-seq signal profiles in the chromatin regions excluding primed chromatin following the expression of JUN-AA shown in Fig. 5a.

## Supplementary Figure 5

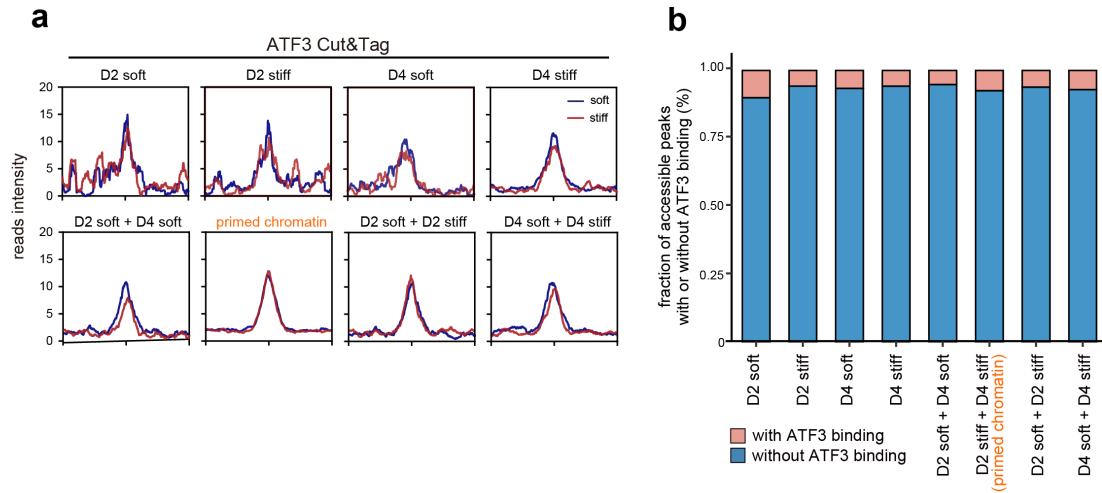

**Fig. S5 Enrichment profile of ATF3 AP-1 TFs in the global and primed chromatin regions.**

- Cut&Tag signal showing the binding of ATF3 in different chromatin region clusters defined in **Fig. 2a**.
- Stacked bar plots showing the binding fraction of ATF3 in defined chromatin region clusters. Primed chromatin is highlighted in yellow.

## Supplementary Figure 6

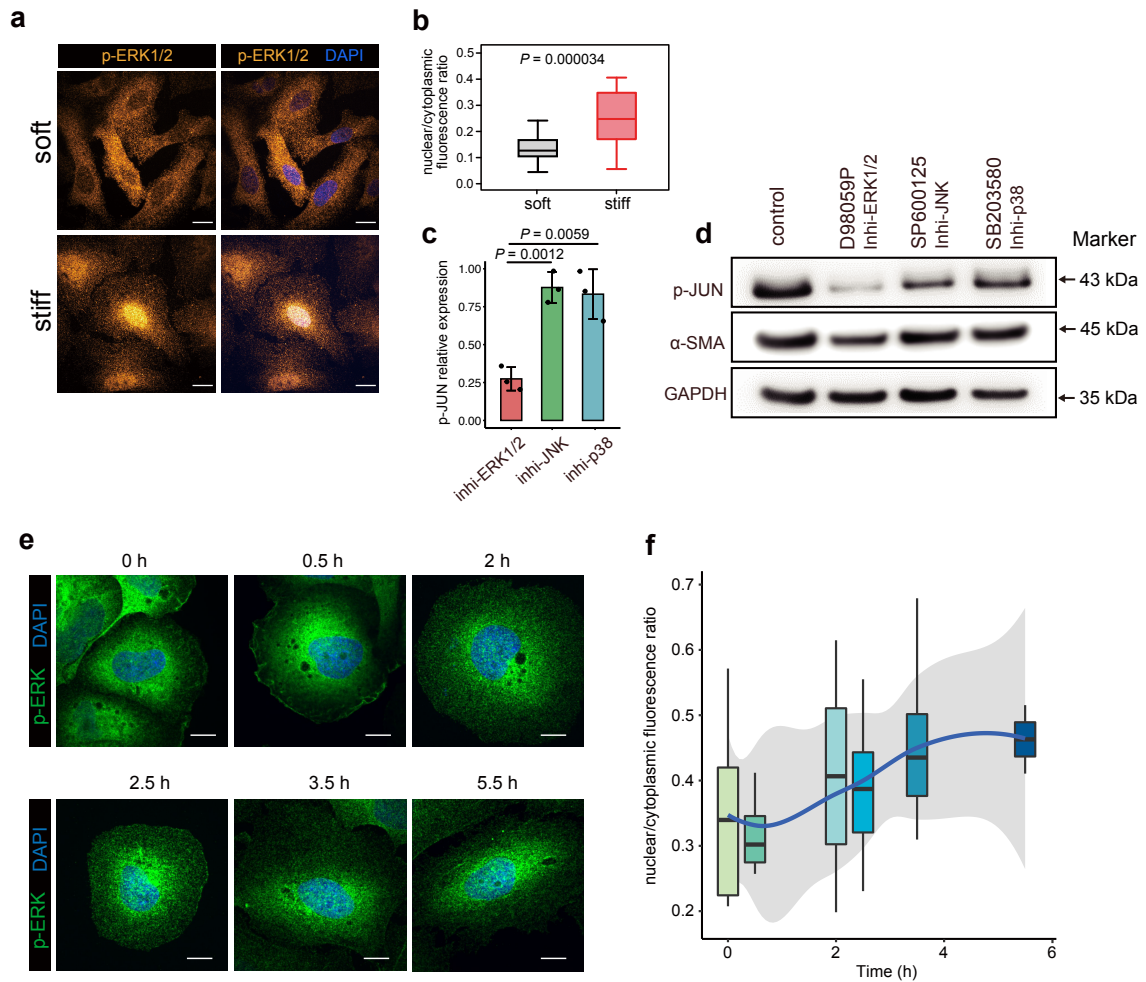

**Fig. S6 Timing and duration of the nuclear ERK activity.**

- Nuclear localization of p-ERK1/2 in cells cultured on soft and stiff matrices.  $n=10$  images per condition (scale bar, 10  $\mu\text{m}$ ).
- Quantitative analysis of nuclear/cytoplasmic fluorescence ratios showing a higher p-ERK nuclear localization rate in the stiff matrix ( $n > 20$  cells, two-tailed wilcoxon test).
- Quantitative analysis of the western blot, showing the protein expression levels of p-JUN in cells cultured on the stiff matrix following inhibition of ERK, JNK, and p38 separately (one-way ANOVA; 3 independent experiments).
- Western blots showing the protein expression levels of p-JUN in cells cultured on the stiff matrix following inhibition of ERK, JNK, and p38 separately. Western-blot are representative of three independent experiments.
- Nuclear localization of p-ERK1/2 in cells transferred to the stiff matrixes after two-day culturation on the soft matrix (scale bar, 5  $\mu\text{m}$ ).
- Quantitative analysis of nuclear/cytoplasmic fluorescence ratios showing a higher p-ERK nuclear localization rate in the stiff matrix ( $n > 5$  cells per condition).

**Supplementary Table S1**

| Primer          | Sequence               |
|-----------------|------------------------|
| $\alpha$ -SMA-F | GCCATGTTCTATCGGGTACTTC |
| $\alpha$ -SMA-R | CAGGGCTGTTTTCCCATCCAT  |
| FN1-F           | ACAACACCGAGGTGACTGAGAC |
| FN1-R           | GGACACAACGATGCTTCCTGAG |
| LOX1-F          | GAAACCCTTGCTCGGAAGCTGA |
| LOX1-R          | CAGATCCAGTCTTGCGGACAAG |
| COL1A1-F        | GAGGGCCAAGACGAAGACATC  |
| COL1A1-R        | CAGATCACGTCATCGCACAAAC |
| COL3A1-F        | GGAGCTGGCTACTTCTCGC    |
| COL3A1-R        | GGGAACATCCTCCTTCAACAG  |
| COL8A1-F        | GGGAGTGCTGCTTACCATTTC  |
| COL8A1-R        | AGCGGCTTGATCCCATAGTAG  |
| GAPDH-F         | ACCCAGAAGACTGTGGATGG   |
| GAPDH-R         | TTCAGCTCAGGGATGACCTT   |

**Table. S1 qPCR primer sequence**

The qPCR primers designed for genes of interest to detect their expression.

### Uncropped blot images for Supplementary Figure 3a

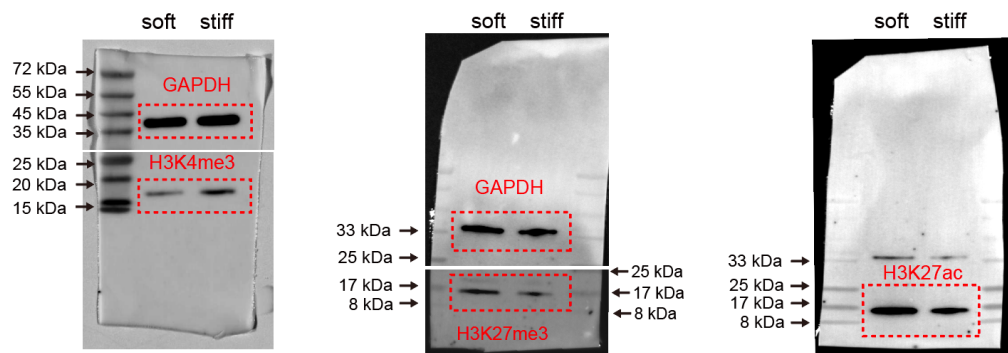

### Uncropped blot images for Figure 4d

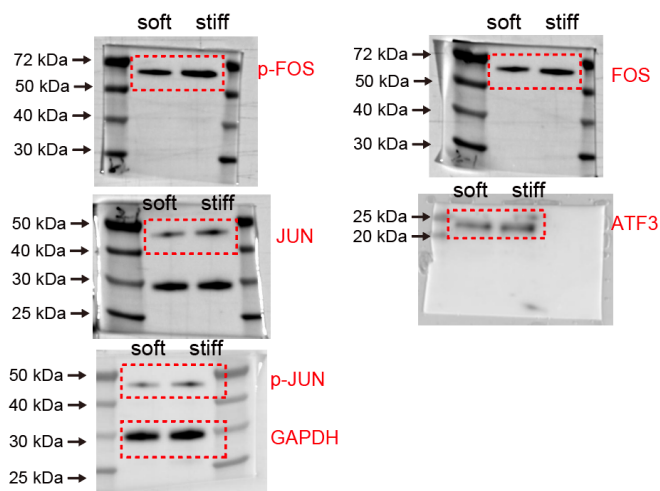

### Uncropped blot images for Supplementary Figure 6d

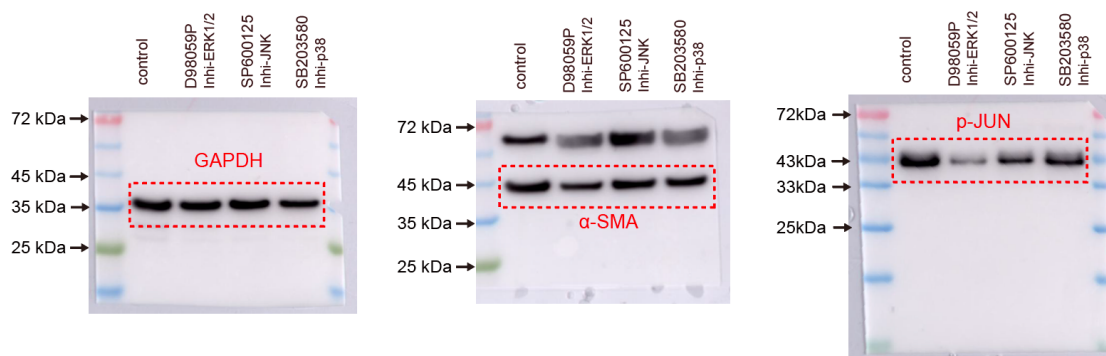

Supplement: MOESM1 [file 42003_2025_8160_MOESM1_ESM.pdf]
